# Supplementary material for: UK trainee experience in interstitial lung disease: results from a British Thoracic Society survey
Source: HighWire-hosted journal article supplement (doi:10.1136/thoraxjnl-2014-206397), 2014-10-28
Supplement: thoraxjnl-2014-206397supp_appendix1.pdf [file thoraxjnl-2014-206397supp_appendix1.pdf]

## **BTS ILD Trainee Survey**

### **Appendix 1 – Methodology**

A survey was constructed to examine training provision in ILD. Respondents were invited to respond to a variety of multiple choice questions along themes of training opportunities and trainee experience/confidence in various aspects of ILD (see Appendix). This was disseminated to BTS trainee members via the society's mail-list in November 2013 with a further reminder email sent in December 2013.
